# Supplementary material for: DFT studies on the effect of additives on stereoselectivity in the polymerization of styrene catalyzed by rare-earth metal complexes
Source: Royal Society of Chemistry journal article supplement (doi:10.1039/d3nj02625f), 2023-01-01
Supplement: d3nj02625f1.pdf [file d3nj02625f1.pdf]

## DFT Studies on the Effect of Additives on Stereoselectivity in the Polymerization of Styrene Catalyzed by Rare Earth Metal Complexes

Xin Wen,<sup>a,1</sup> Xiaonan Xing,<sup>d,1</sup> Wenzhen Zhang,<sup>a</sup> Han Lu,<sup>a</sup> Ling Zhu,<sup>a</sup> Xiaowei Xu,<sup>c</sup> Yanan Zhao,<sup>\*b</sup>  
Dongmei Cui<sup>\*,d</sup> and Yi Luo<sup>\*,a,c</sup>

<sup>a</sup>State Key Laboratory of Fine Chemicals, School of Chemical Engineering, Dalian University of Technology, Dalian 116024, China. E-mail: luoyi@dlut.edu.cn

<sup>b</sup>State Key Laboratory of Organometallic Chemistry, Shanghai Institute of Organic Chemistry, Chinese Academy of Sciences, Shanghai 200032, China. E-mail: yananzhao99@sioc.ac.cn

<sup>c</sup>PetroChina Petrochemical Research Institute, Beijing, 102206, China.

<sup>d</sup>State Key Laboratory of Polymer Physics and Chemistry, Changchun Institute of Applied Chemistry, Chinese Academy of Sciences, Changchun 130022, China. E-mail: dmcui@ciac.ac.cn

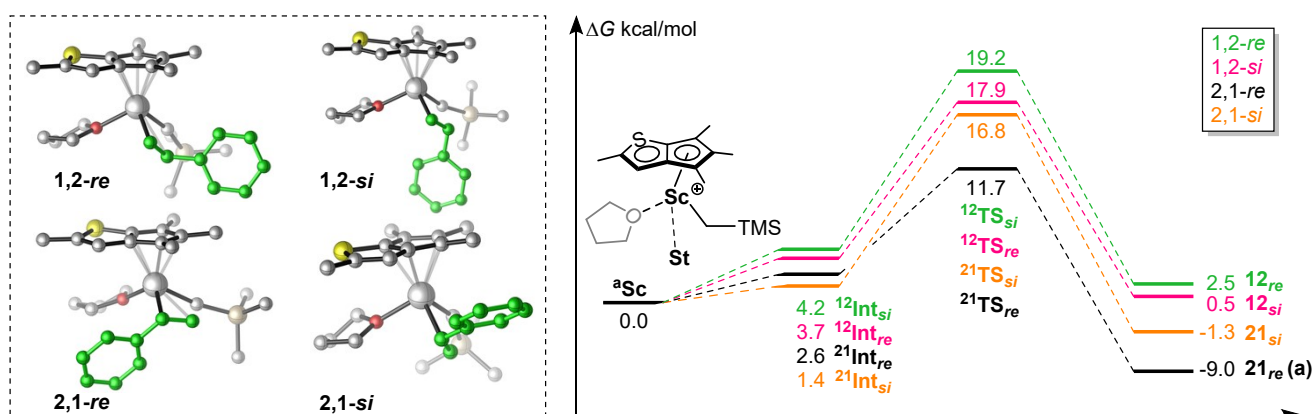

**Fig. S1.** Computed energy profiles for  $^a\text{Sc}$  mediated various insertion manners of styrene. Energies are relative to the corresponding cationic species  $^a\text{Sc}$  and styrene.

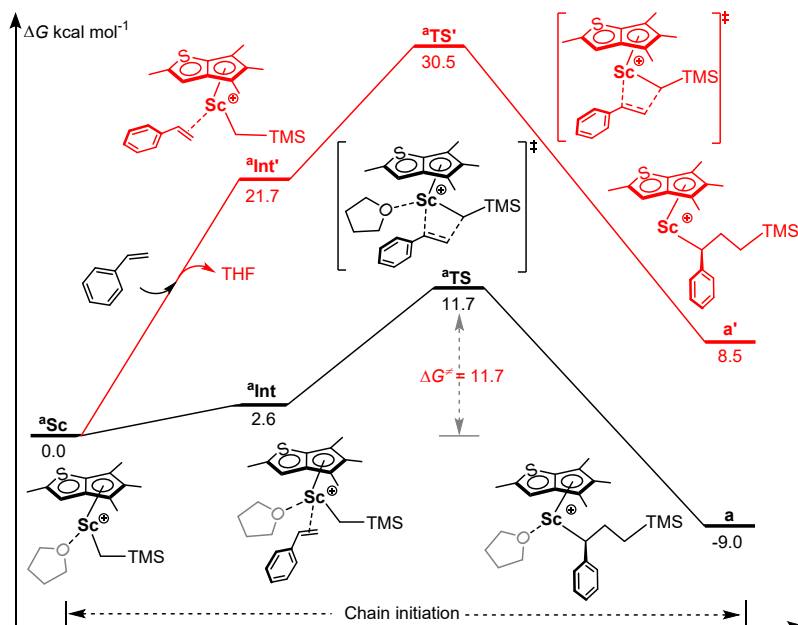

**Fig. S2.** Calculated energy profiles for styrene insertion into  ${}^a\text{Sc}$  with THF (black curve) and without THF (red curve) of the first molecule. Energies are relative to the corresponding cationic species  ${}^a\text{Sc}$  and styrene.

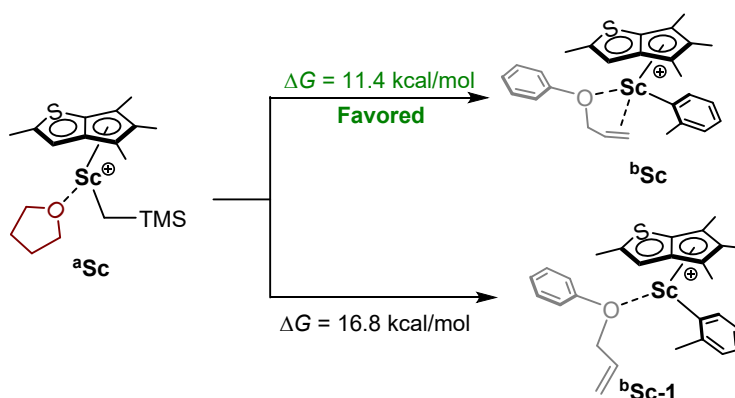

**Fig. S3** Computed energy difference between  ${}^a\text{Sc}$  and  ${}^b\text{Sc}$  or  ${}^b\text{Sc-1}$ .

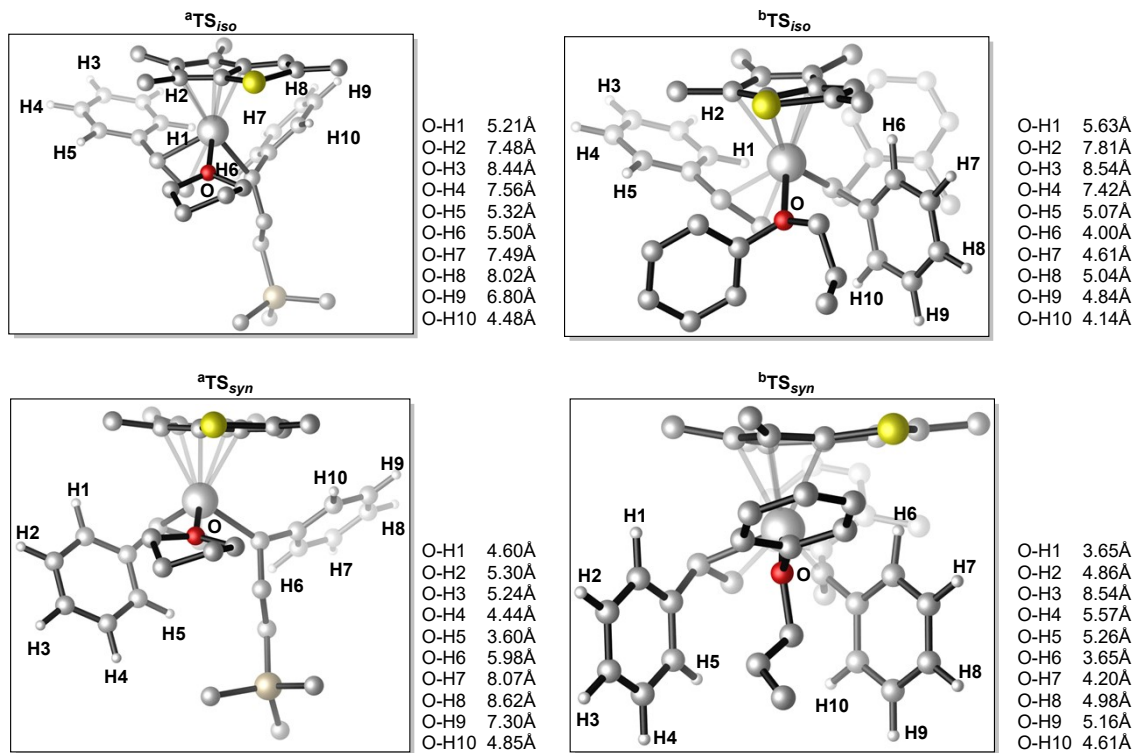

**Fig. S4** Geometric structure analysis of <sup>a</sup>TS<sub>iso</sub>, <sup>a</sup>TS<sub>syn</sub>, <sup>b</sup>TS<sub>iso</sub> and <sup>b</sup>TS<sub>syn</sub>.

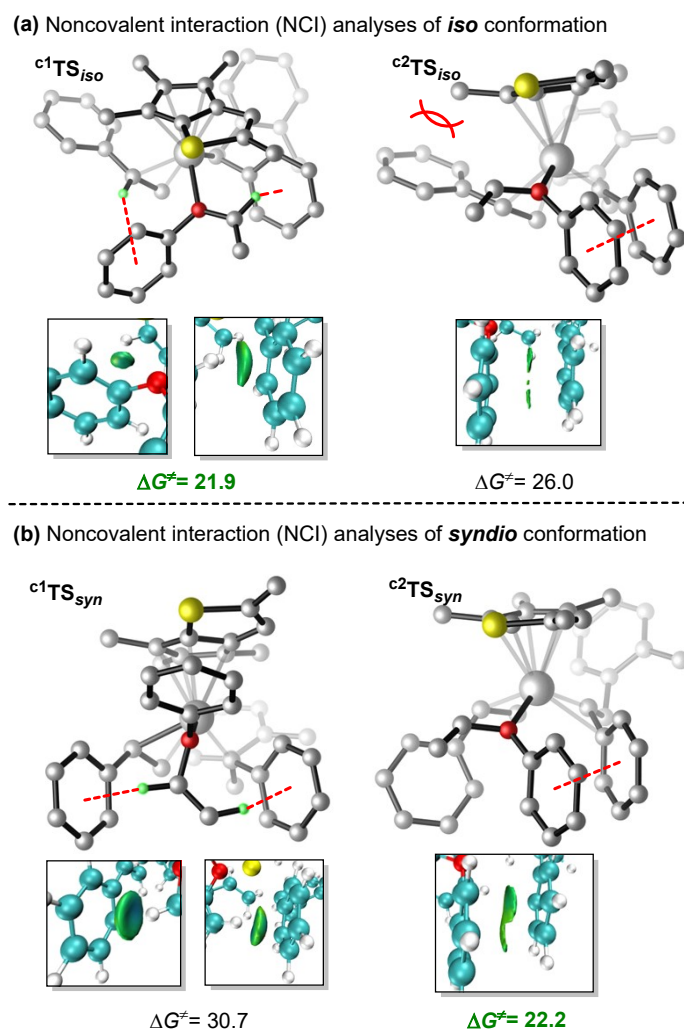

**Fig. S5** Noncovalent interaction (NCI) analyses of different conformations in the presence of VOB.

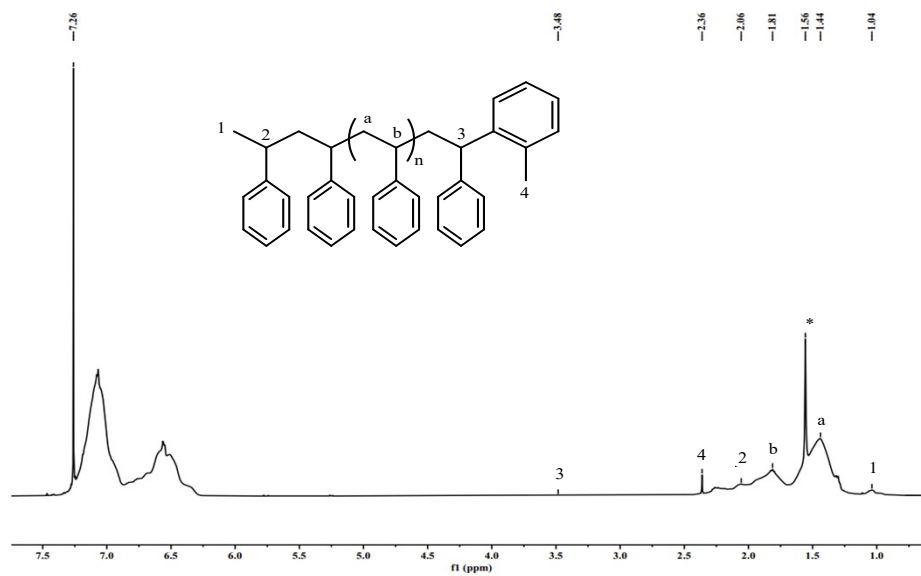

**Fig. S6.** <sup>1</sup>H NMR spectrum of aPS (Table 1, entry 4) obtained in toluene. (25 °C, CDCl<sub>3</sub>, \*H<sub>2</sub>O).

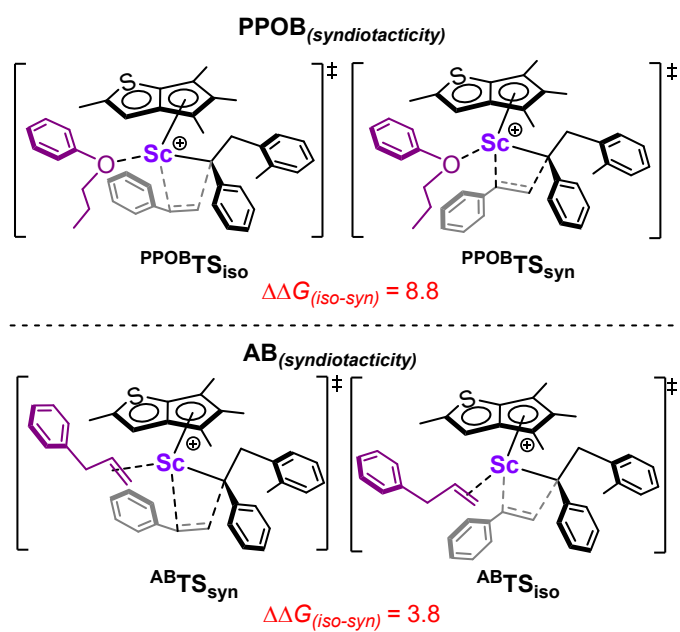

**Fig. S7** The energy barrier difference between the isotactic TS and the syndiotactic TS at the chain propagation stage when the additives are PPOB and AB.
